# Supplementary material for: The effect of regional selectivity on the corrosion inhibition properties of synthetic ionic liquidviathe synergistic action of the cation and anion
Source: Royal Society of Chemistry journal article supplement (doi:10.1039/d1nj03529k), 2021-01-01
Supplement: d1nj03529k1.pdf [file d1nj03529k1.pdf]

## Electronic Supporting Material

### The Effect of Regional Selectivity on the Corrosion Inhibition Properties of Synthetic Ionic Liquid with the Synergistic Action of Cation and Anion

Jian Sun<sup>1</sup>, Xinyue Wang<sup>1</sup>, Huajing Gao<sup>1</sup>, Xingbao Wang<sup>2\*</sup>, Jianlin Zhang<sup>3</sup>, Zhaohui Jin<sup>1\*</sup>

1. Jilin Institute of Chemical Technology, Institute of Petrochemical Technology, Jilin, 132022, China

2. Taiyuan University of Technology, Coal Chemical Research Institute, Taiyuan, 030024, China

\*Yellow River Delta JingboChemical Research Institute Co. LTD, Shandong, 256500, China

| No. | Contents                                                     | Page No. |
|-----|--------------------------------------------------------------|----------|
| 1   | Fig. S1(a). <sup>1</sup> H NMR spectrum of ILHS <sub>1</sub> | 2        |
| 2   | Fig. S1(b). <sup>1</sup> H NMR spectrum of ILHS <sub>2</sub> | 3        |
| 3   | Fig. S1(c). <sup>1</sup> H NMR spectrum of ILHS <sub>3</sub> | 4        |
| 4   | Fig. S2. The structure of three ionic liquid hybrids         | 5        |

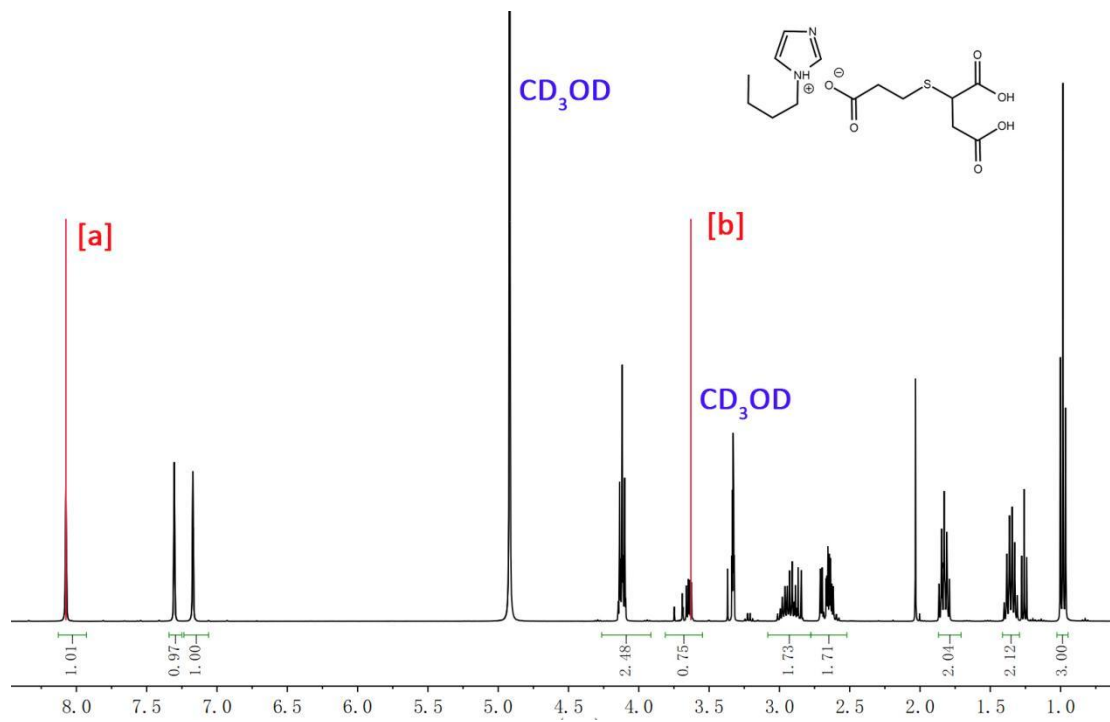

Fig. S1(a). <sup>1</sup>H NMR spectrum of ILHS<sub>1</sub>

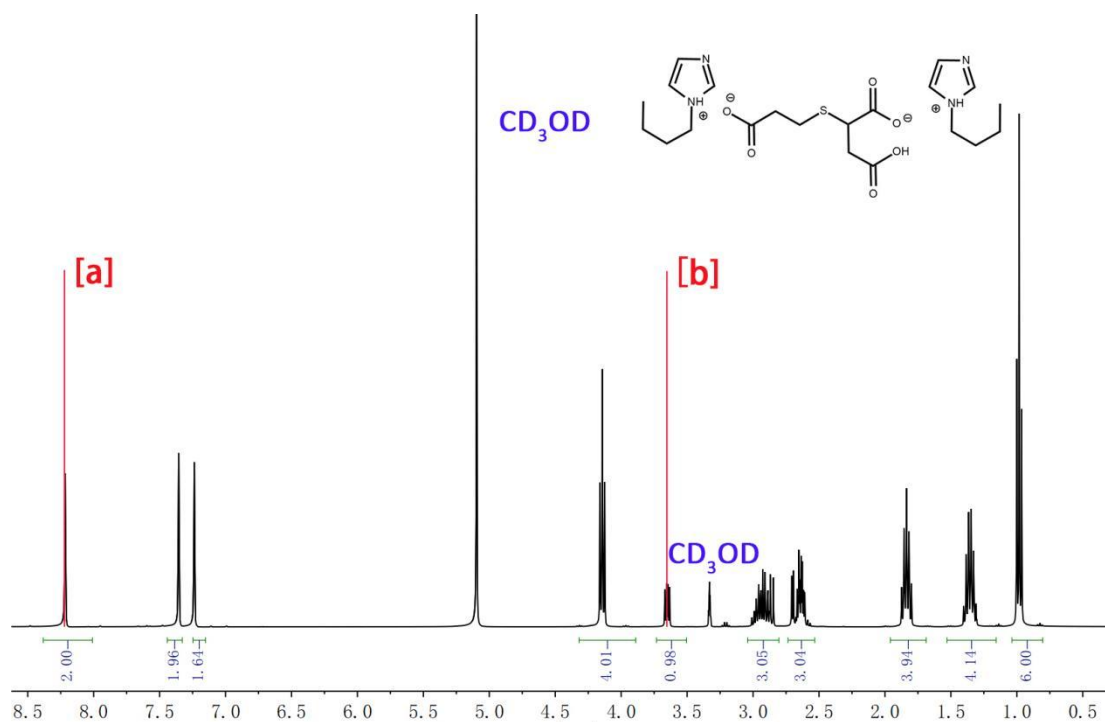

Fig. S1(b).  $^1\text{H}$  NMR spectrum of ILHS<sub>2</sub>

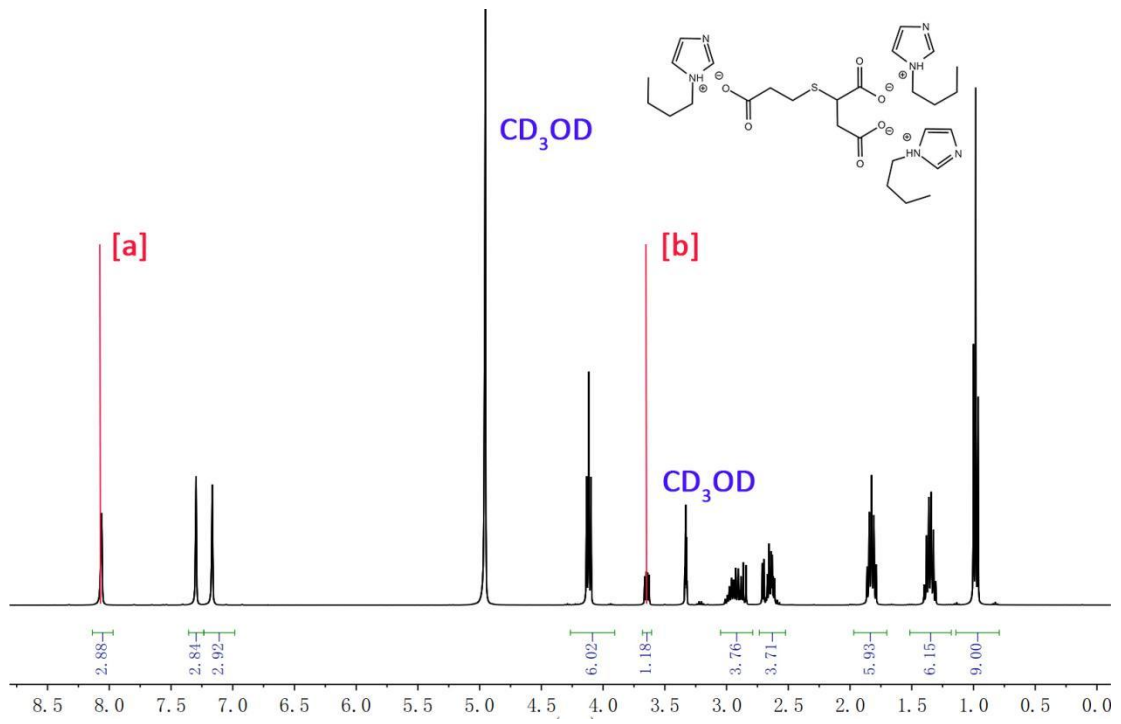

Fig. S1(c).  $^1\text{H}$  NMR spectrum of ILHS<sub>3</sub>

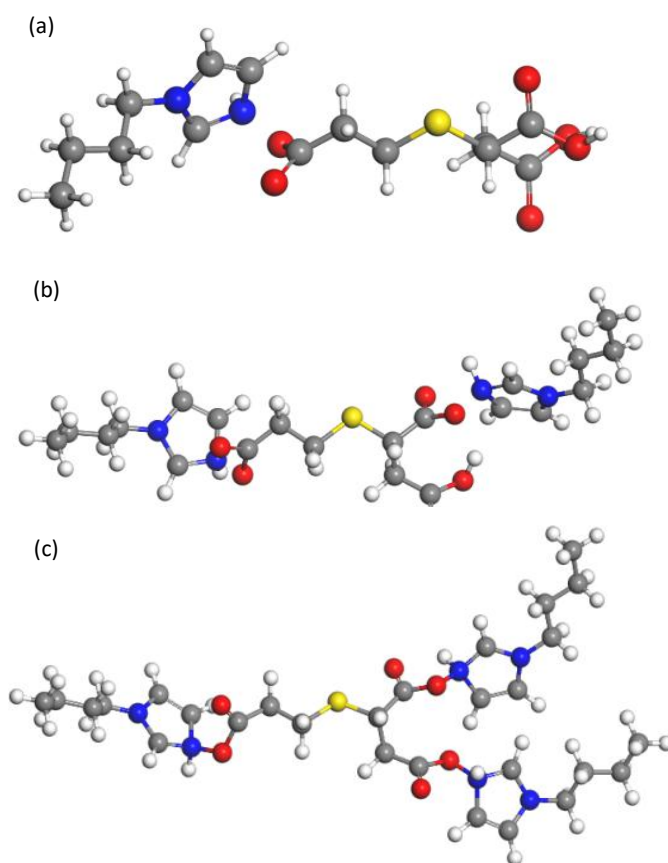

Fig. S2. The structure of three ionic liquid hybrids: ILHS<sub>1</sub> (a) and ILHS<sub>2</sub> (b) and ILHS<sub>3</sub> (c)
